# Supplementary material for: Structural Modifications and Novel Protein-Binding Sites in Pre-miR-675—Explaining Its Regulatory Mechanism in Carcinogenesis
Source: MDPI journal article supplement (doi:10.3390/ncrna9040045), 2023-08-10
Supplement: s1 [file s1]

[illegible]

Legend: \* = unknown, U = conserved unpaired, + = unpaired -> paired, x = unpaired -> pseudoknot P = conserved paired, p = paired -> pseudoknot, - = paired -> unpaired S = conserved pseudoknot, s = pseudoknot -> paired, \_ = pseudoknot -> unpaired

[illegible]

UUUUUUUUUPPPUUPPPUPPPPPPPPPUUPPUUPPPPUUUUPPPUUPPPPPUPPUPPPUPPUUPPPUUUUUUUUUUUPPPUPPPPPUPPPPPPPUUUPPPUUPPUPPPUPPUPPPPPPPPPUPPPUUPPP&PPPPPP  
UPPPUPPPPPUPPPPPPPUUPPPPPPUUUUUUUUUUPPPPPPUUPPPPPUPPPPPPPUPPPPPPP'

Legend: \* = unknown, U = conserved unpaired, + = unpaired -> paired, x = unpaired -> pseudoknot P = conserved paired, p = paired -> pseudoknot, - = paired -> unpaired S = conserved pseudoknot, s = pseudoknot -> paired, \_ = pseudoknot -> unpaired

H19\_Exon3='.....(((((((....))(((((((....))))))).((((.....))))).((((.....))))).((((....))))).)))'.....'  
mir-675='(((((((.(((.((((.((((..((((((.....)))))).)..)))))).)))))).))))))'.....'  
cofold='....(....((((((((((((((((((((((((({....}))))))).....(((.((((....(((.(....(((((((..(((((,((((.....&....))))))).)..)))))))))).)))))))))).))..)))))).))))).)))...)'

UUUU++UUU++++PPPPPP++PPPPPPPPpUUUUpPPPPPPPU-----UUU++-PPP+----+++U++U-PPP+PPP--+UUPPPP\*\*PPP--UUUUUUUUUU&----PPP+PPPPUPP--+PPPPPP++P-PPPP++++U++U-PPPP+UPPP-P+PP\*--\*PP+P---PP-'

Legend: \* = unknown, U = conserved unpaired, + = unpaired -> paired, x = unpaired -> pseudoknot P = conserved paired, p = paired -> pseudoknot, - = paired -> unpaired S = conserved pseudoknot, s = pseudoknot -> paired, = pseudoknot -> unpaired

[illegible][illegible]

Legend: \* = unknown, U = conserved unpaired, + = unpaired -> paired, x = unpaired -> pseudoknot P = conserved paired, p = paired -> pseudoknot, = paired -> unpaired S = conserved pseudoknot, s = pseudoknot -> paired, \_ = pseudoknot -> unpaired
