# Supplementary material
Source: MDPI journal article supplement (https://www.mdpi.com/2311-553X/9/4/45)

A

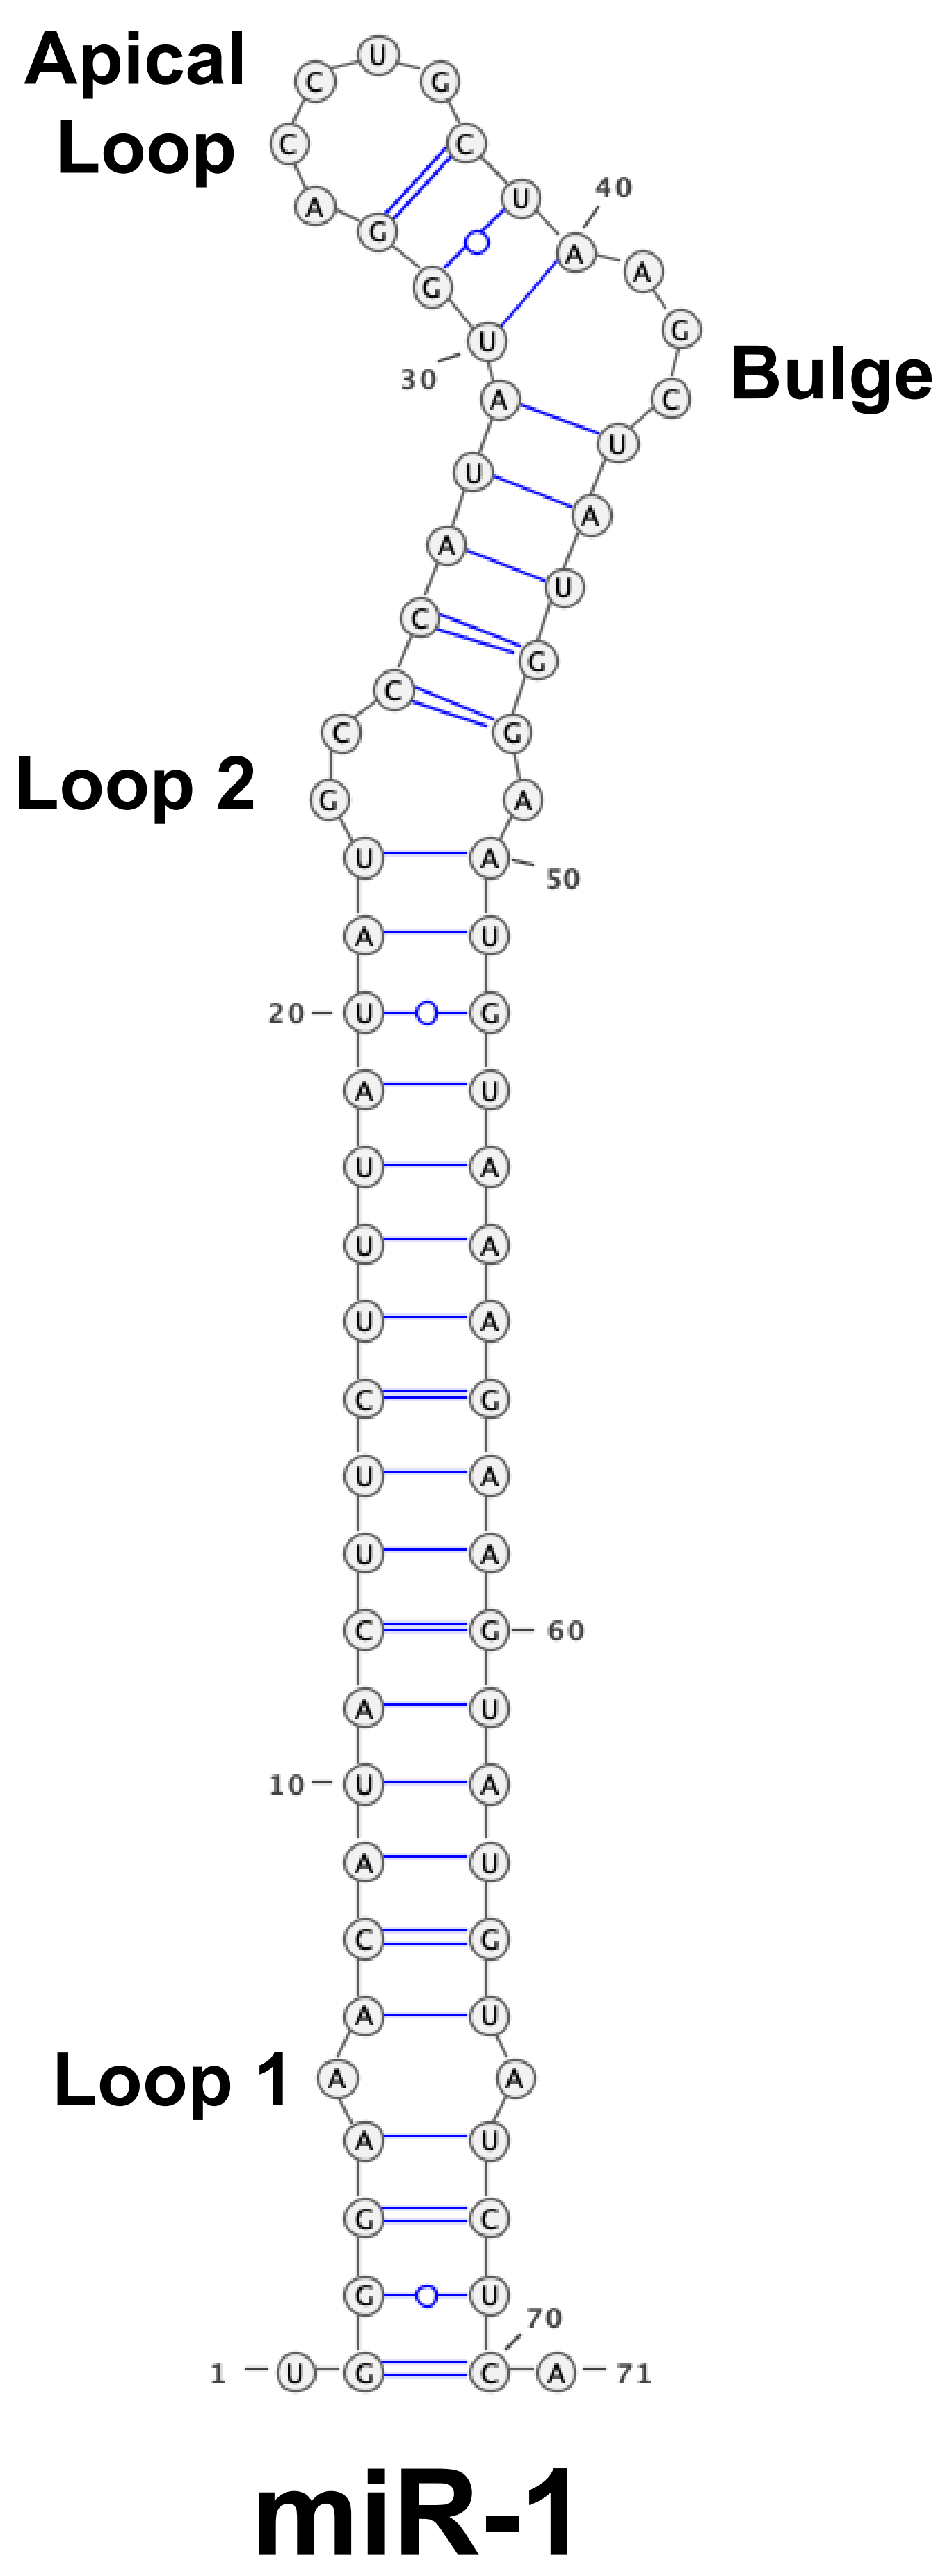

B

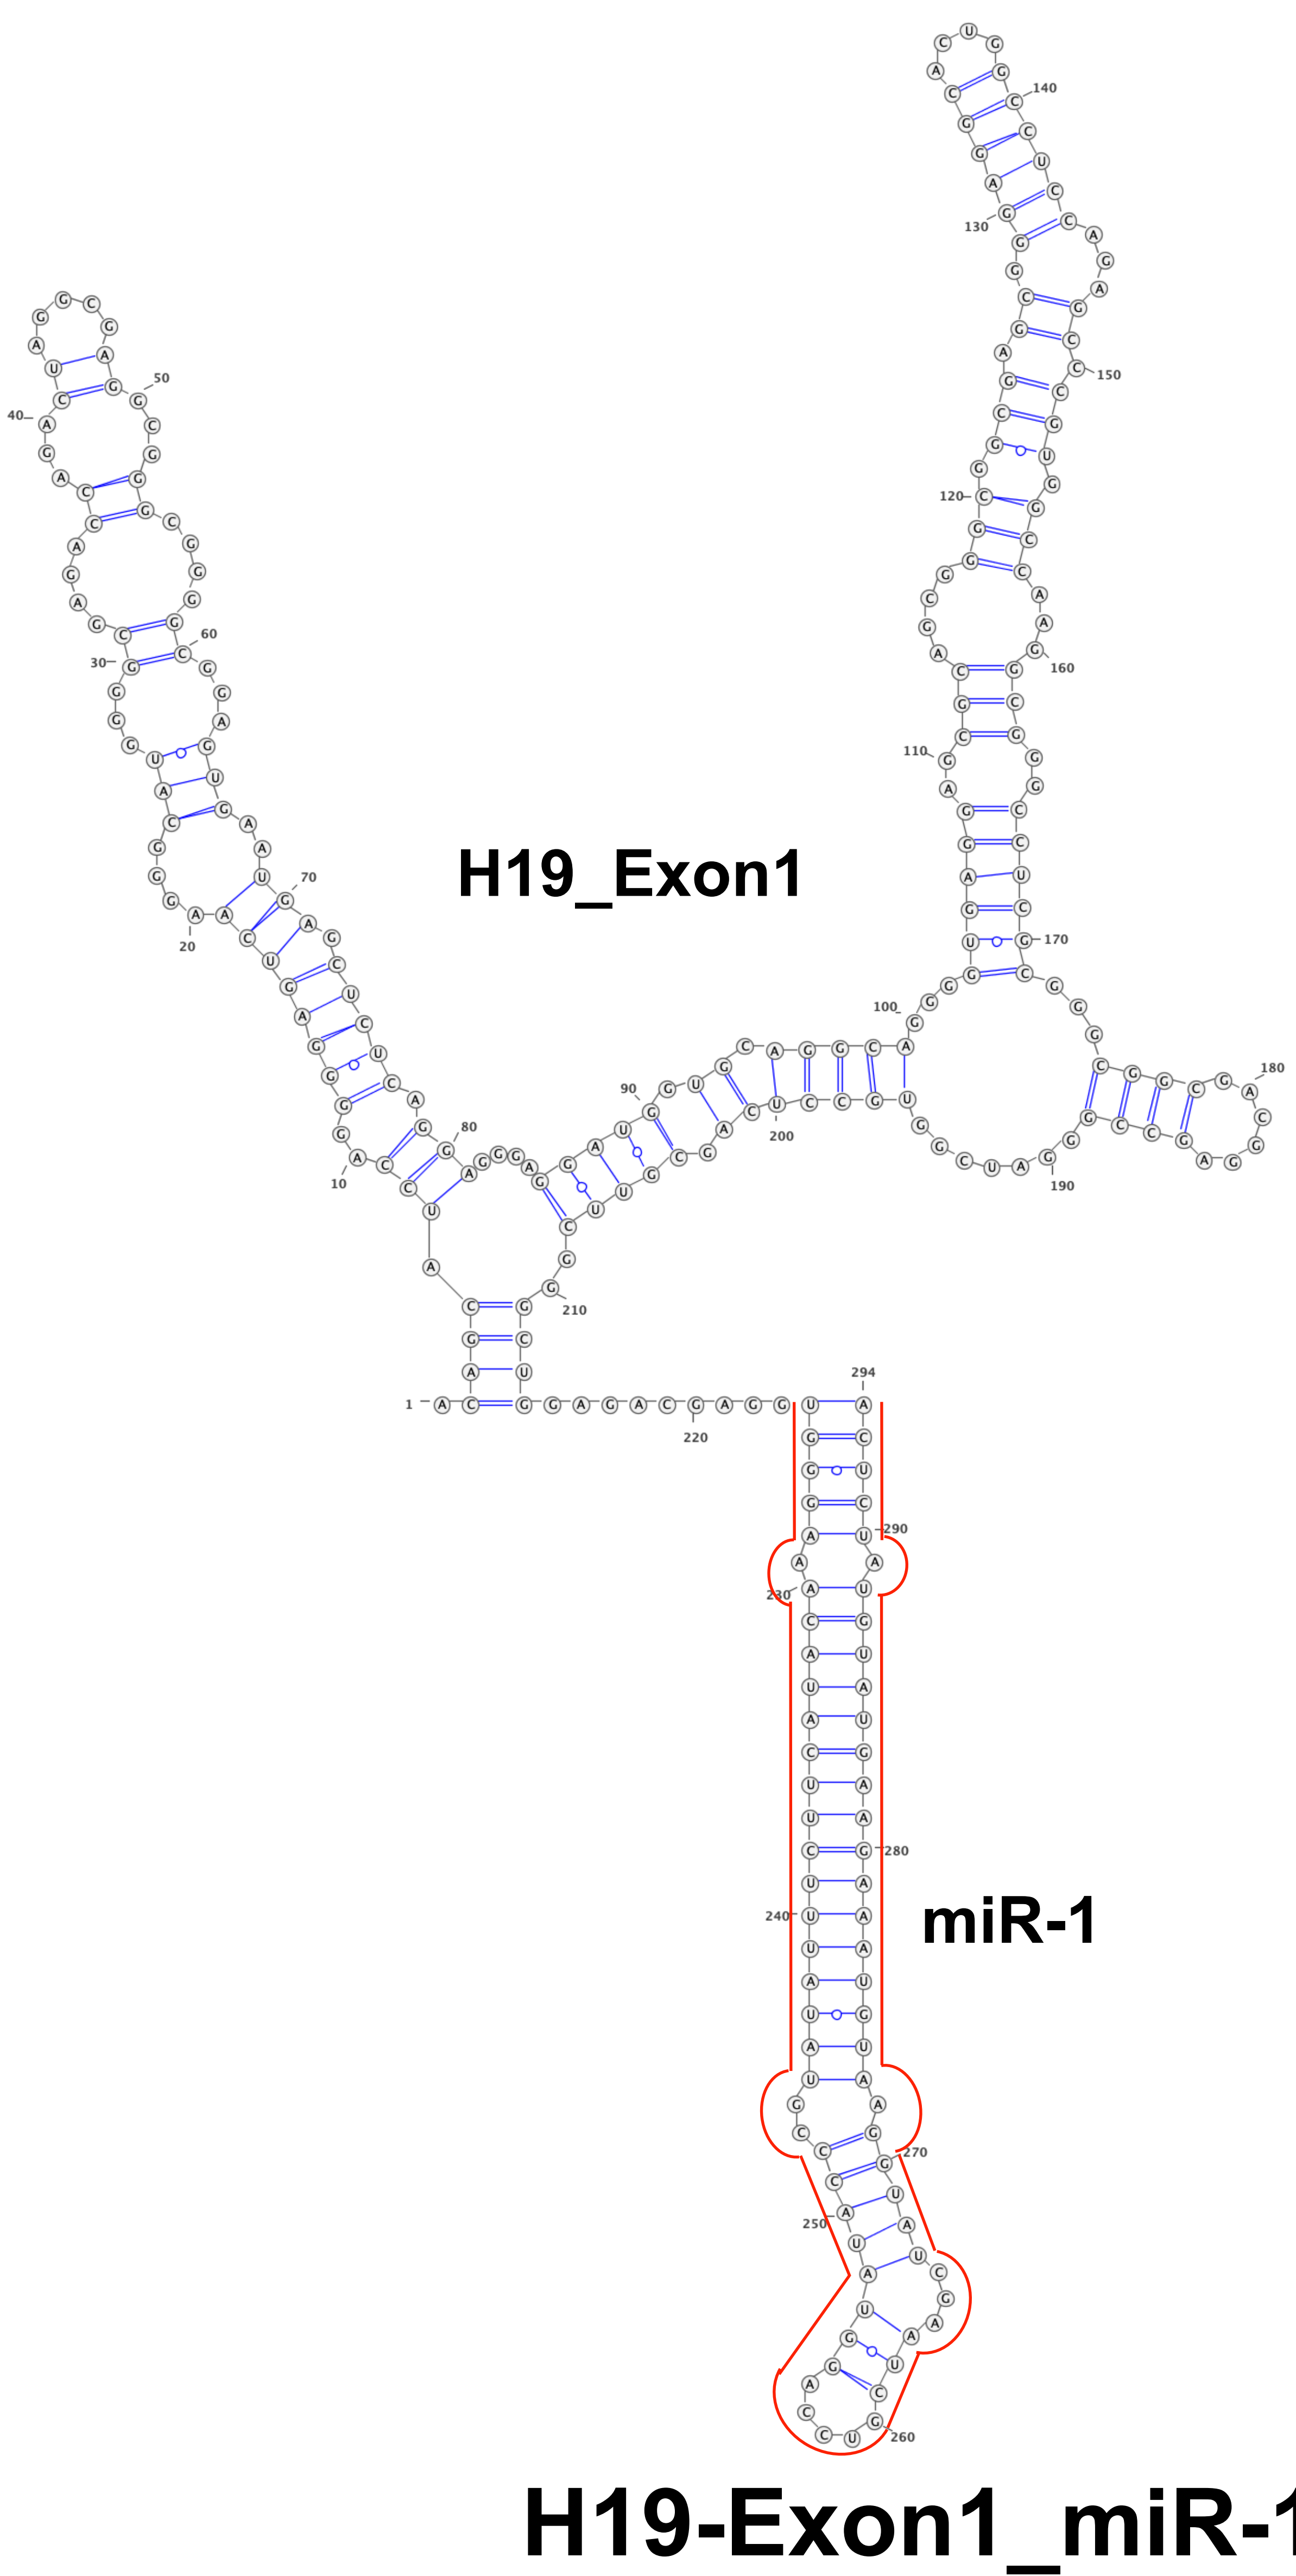

C

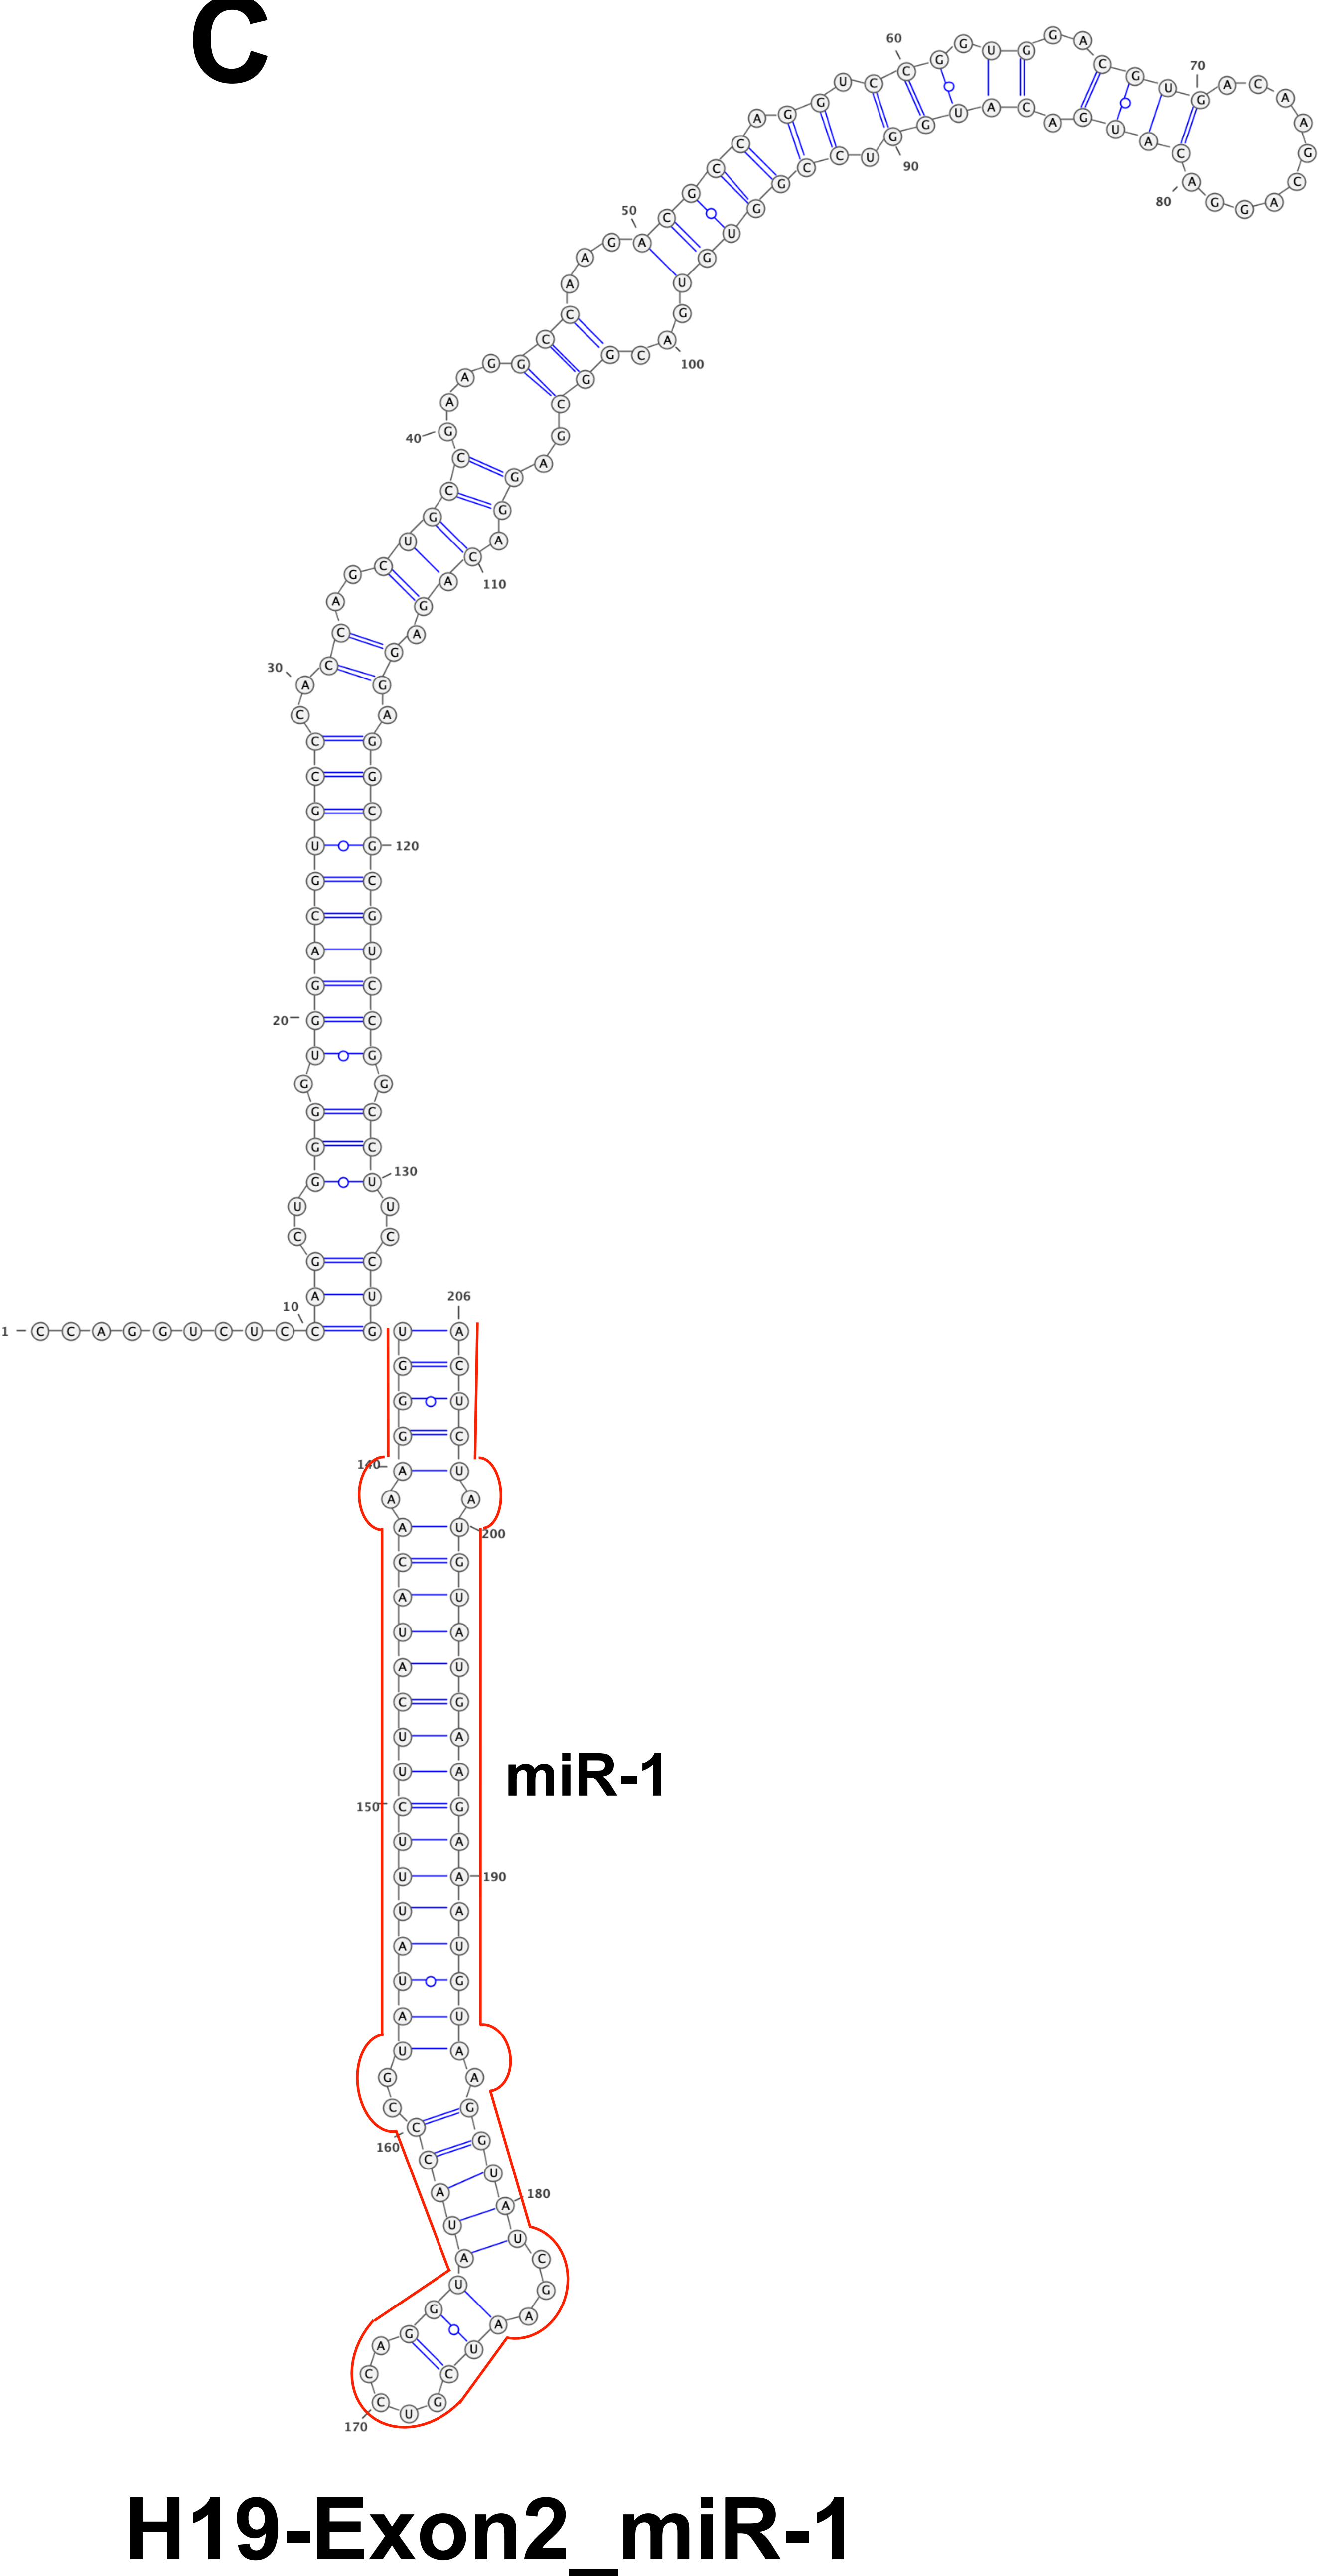

D

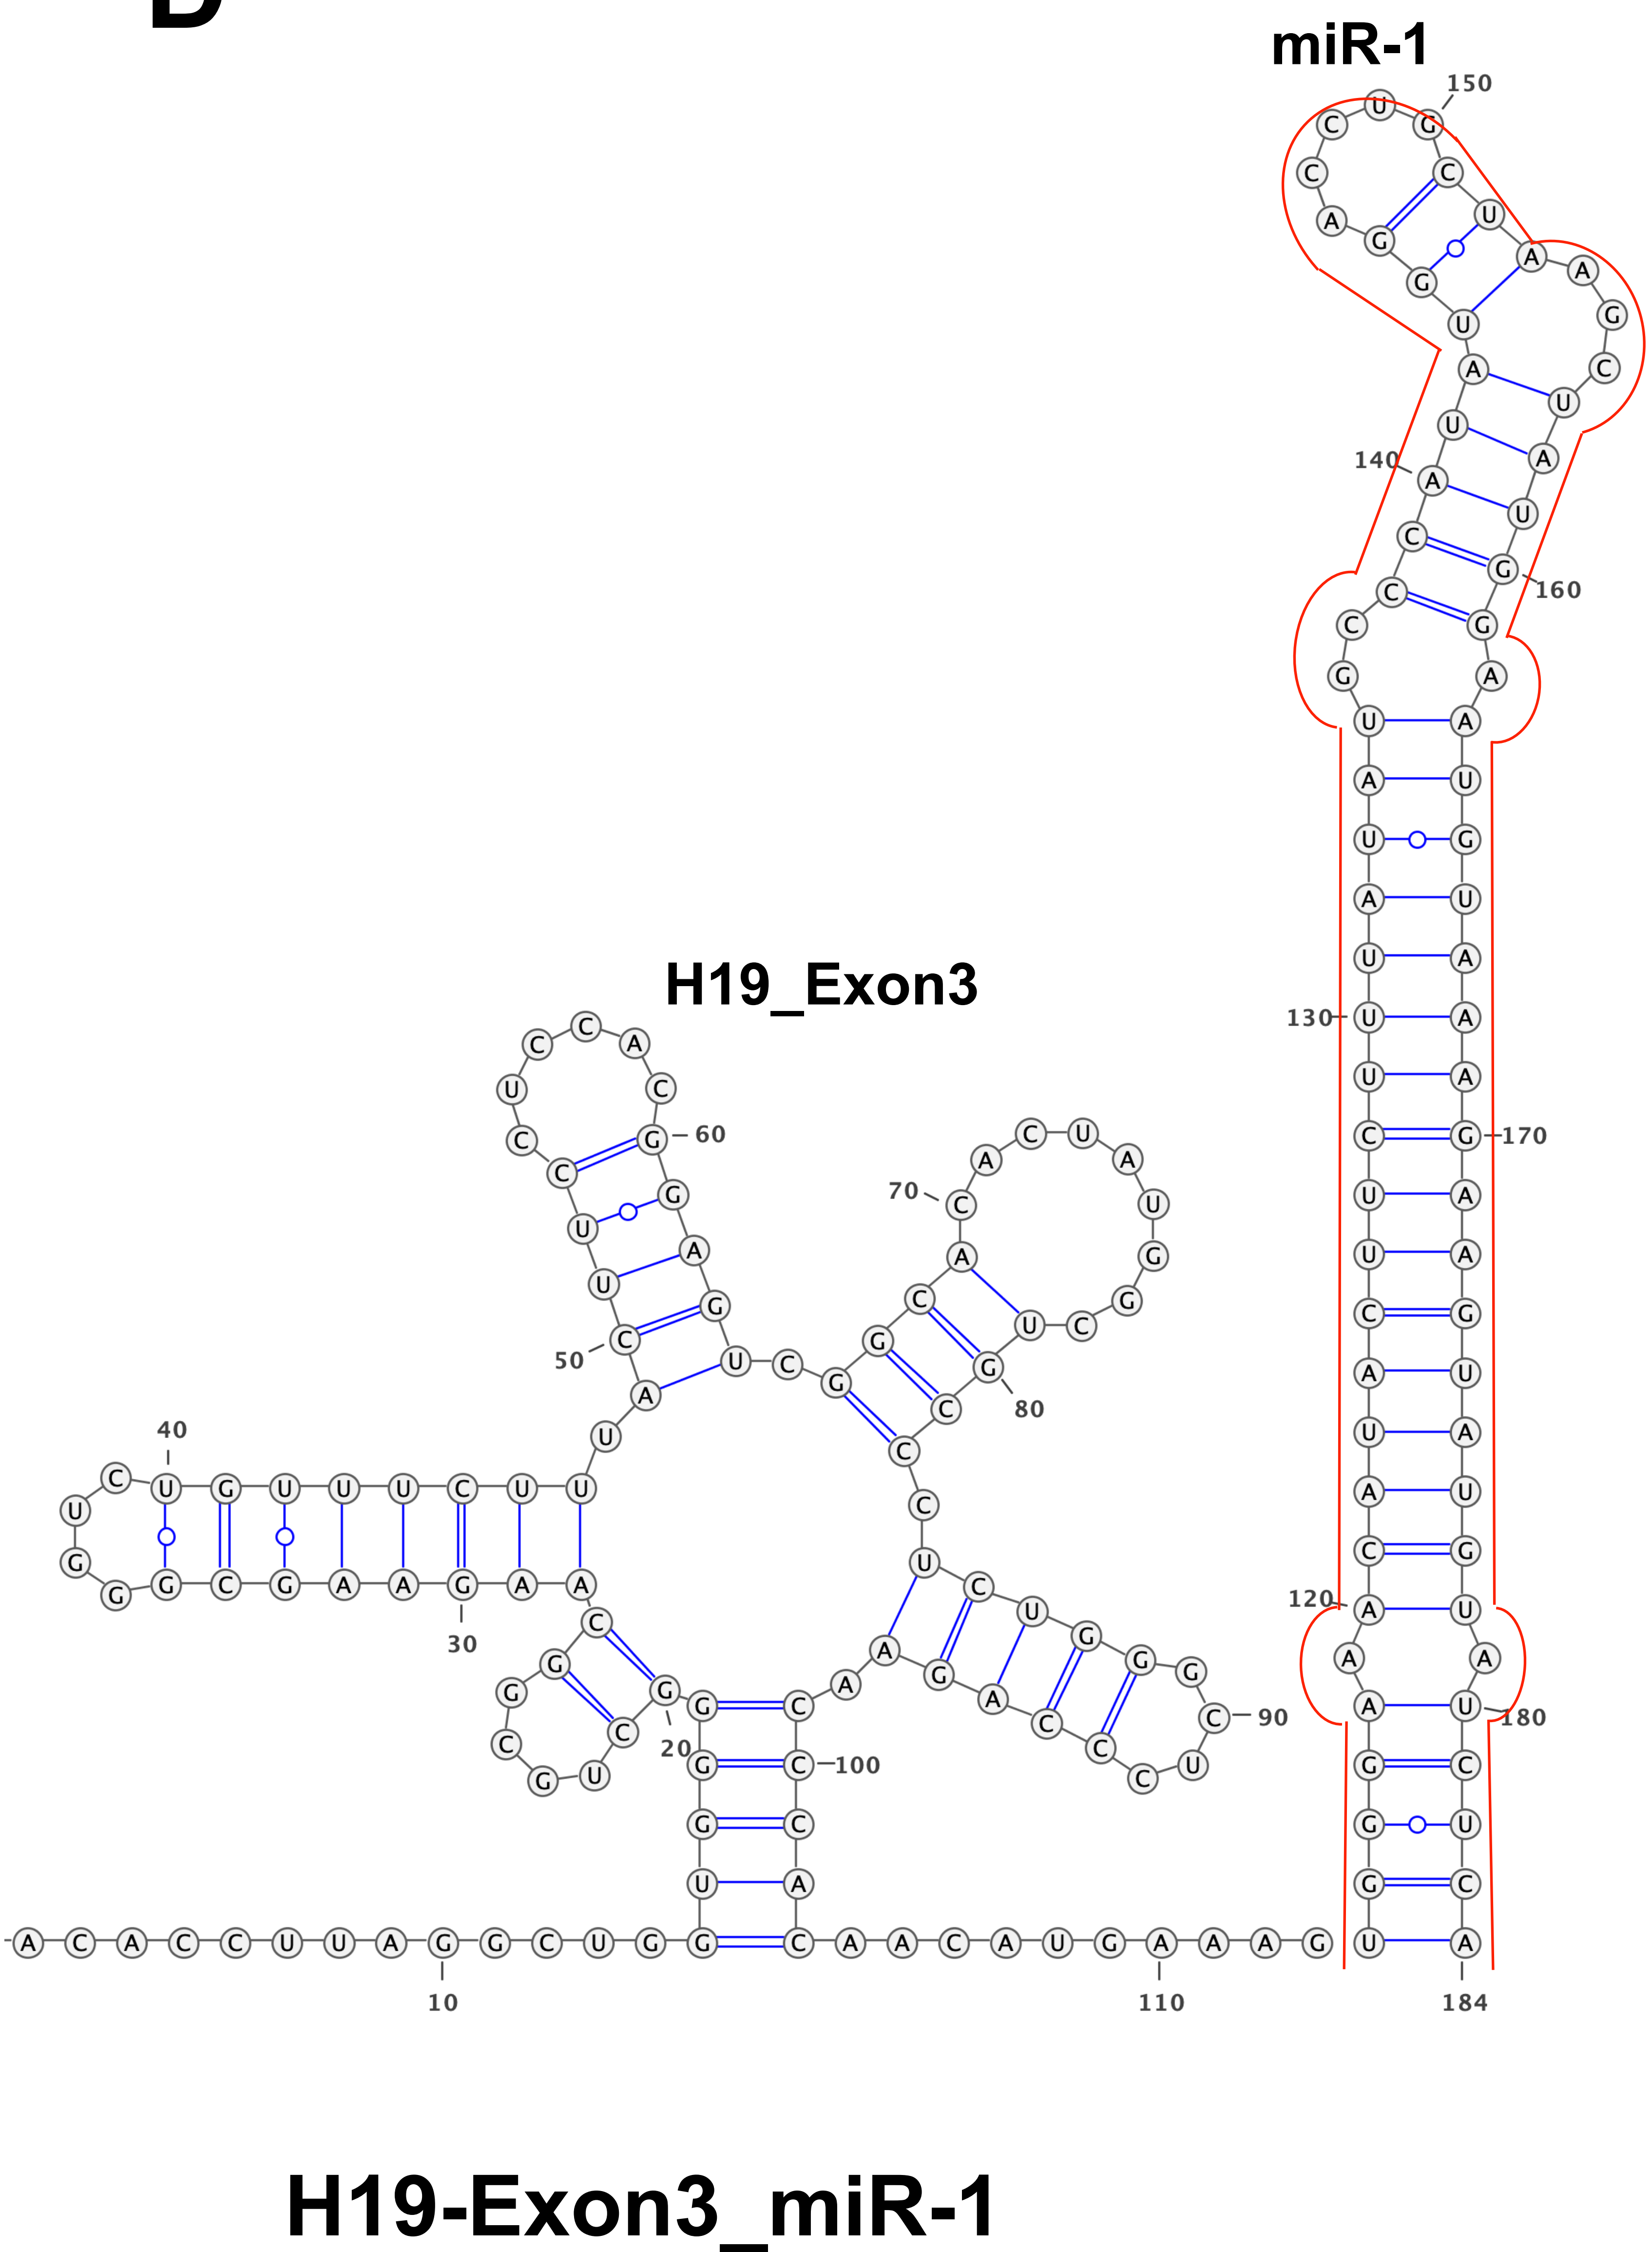

Supplement: s1 [file s1]

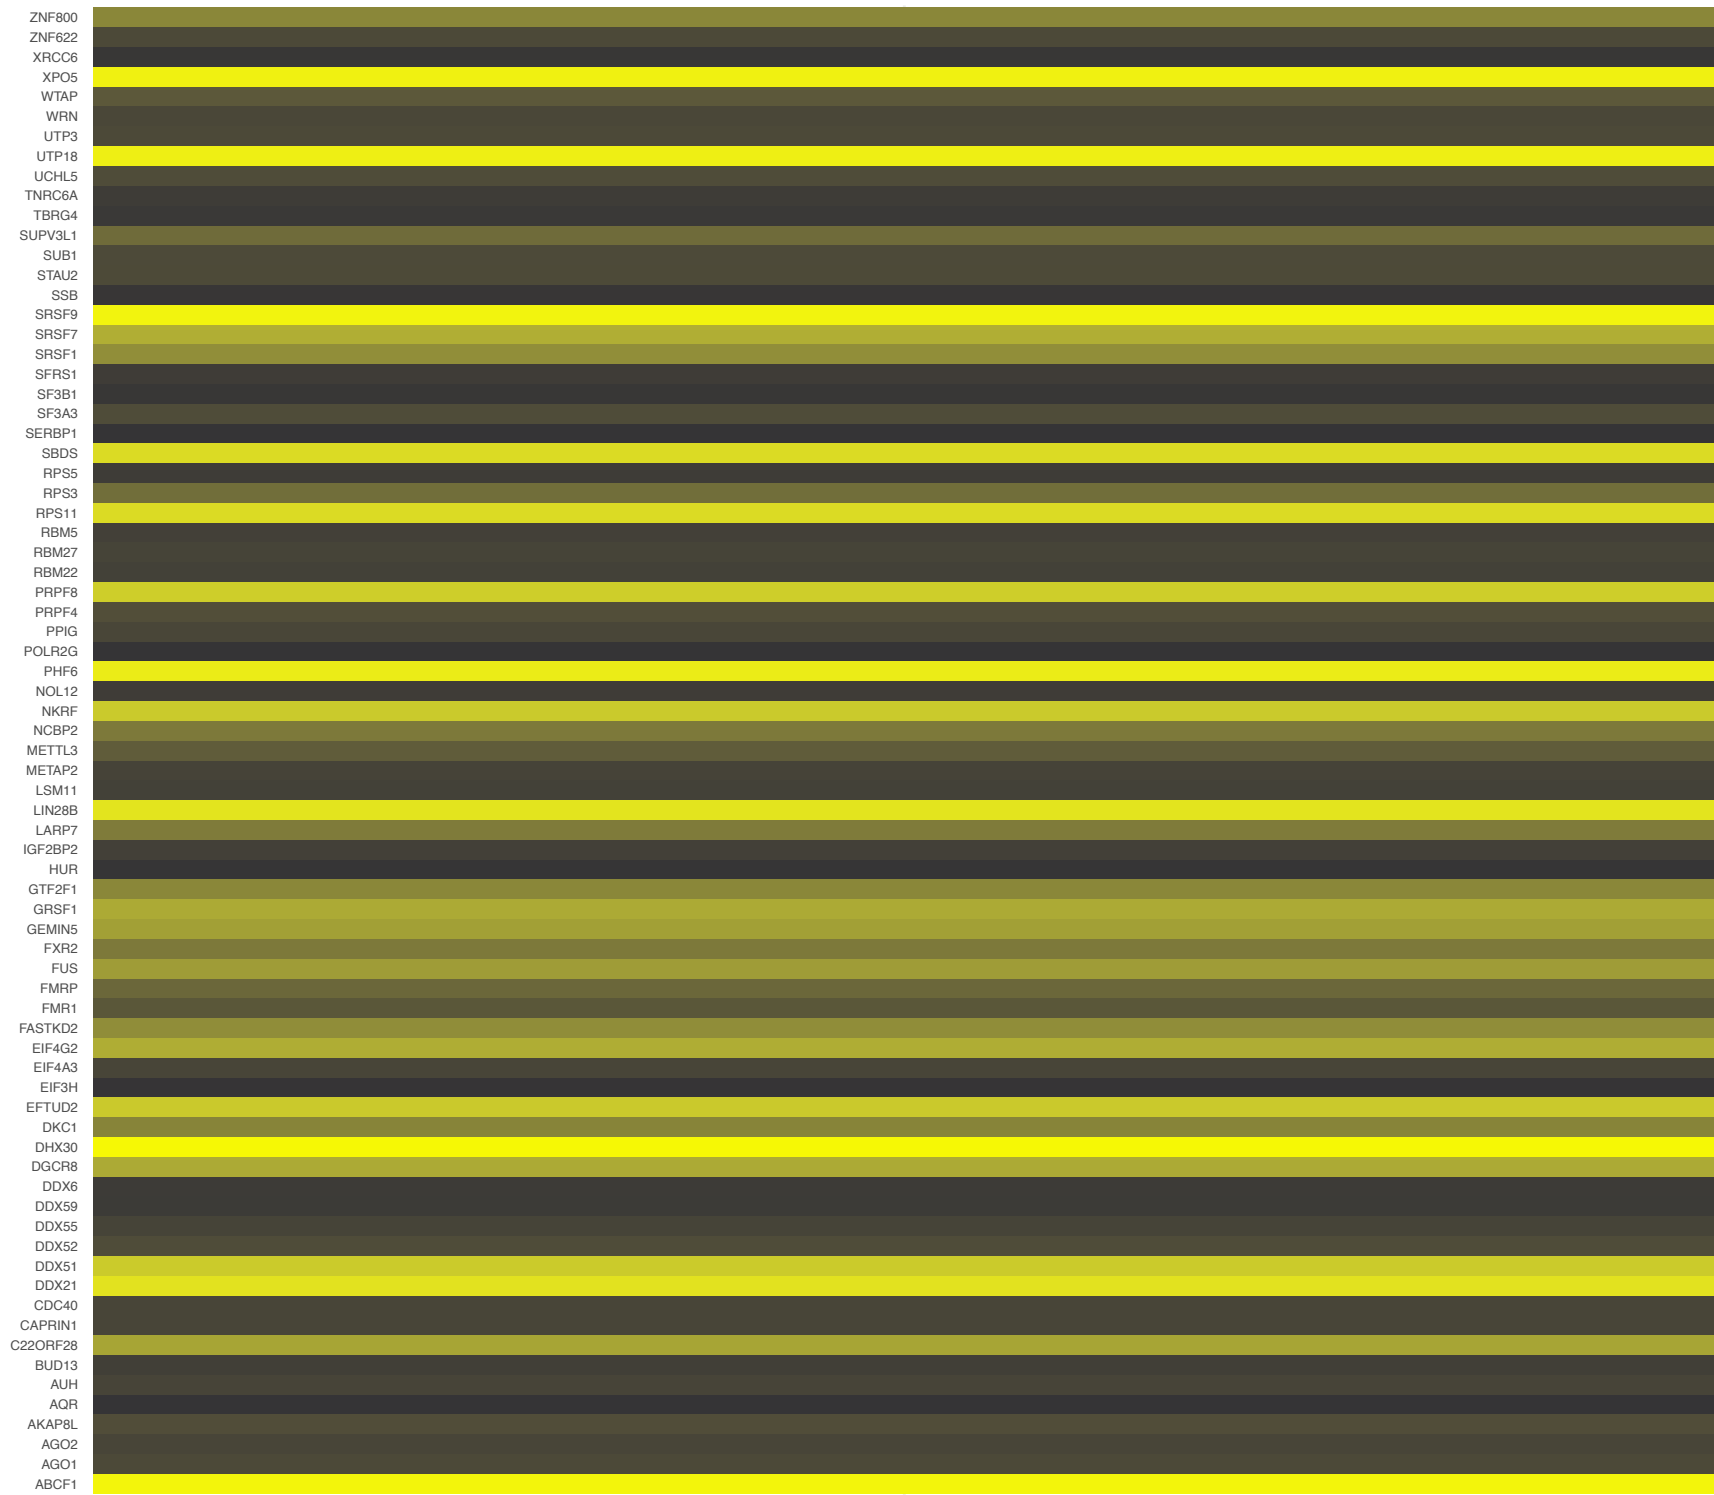

value

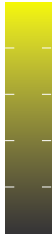

0.9

0.8

0.7

0.6

Supplement: s1 [file s1]
